# Supplementary material
Source: ML conference proceedings conference paper supplement (https://proceedings.neurips.cc/paper_files/paper/2024/hash/e4ad9c75f0d60ed75700f020adb3f705-Abstract.html)
Supplement: Supplementary file 1 [file e4ad9c75f0d60ed75700f020adb3f705-Supplemental-Datasets_and_Benchmarks_Track.pdf]

# 549 Appendix

Please refer to the links below for the dataset, repo, website, and live query demo:

- Website: <https://inquire-benchmark.github.io/>
- GitHub: <https://github.com/inquire-benchmark/INQUIRE>
- Data: <https://github.com/inquire-benchmark/INQUIRE/tree/main/data>
- Live Query Demo: <http://ec2-3-147-61-23.us-east-2.compute.amazonaws.com/demo>

## 550 Contents

|     |                                                                  |           |
|-----|------------------------------------------------------------------|-----------|
| 551 | <b>A INQUIRE Query Examples</b>                                  | <b>17</b> |
| 552 | <b>B Additional Details about INQUIRE</b>                        | <b>19</b> |
| 553 | <b>C Additional Details about iNat24</b>                         | <b>20</b> |
| 554 | <b>D Geographic Range of INQUIRE and iNat24</b>                  | <b>20</b> |
| 555 | <b>E Additional Results</b>                                      | <b>21</b> |
| 556 | <b>F Computational Efficiency</b>                                | <b>21</b> |
| 557 | <b>G Evaluation Metrics</b>                                      | <b>23</b> |
| 558 | <b>H iNat24 Image Collection and INQUIRE Annotation Protocol</b> | <b>24</b> |
| 559 | H.1 iNat24 Dataset Curation . . . . .                            | 24        |
| 560 | H.2 Data Annotation . . . . .                                    | 25        |
| 561 | H.3 Data Format and Structure . . . . .                          | 26        |
| 562 | H.4 Ethical Considerations . . . . .                             | 26        |
| 563 | H.5 Participant Compensation . . . . .                           | 27        |
| 564 | H.6 Annotation Instructions . . . . .                            | 27        |
| 565 | <b>I Multi-Modal Model Prompting Details</b>                     | <b>30</b> |
| 566 | <b>J Full List of INQUIRE Queries</b>                            | <b>30</b> |
| 567 | <b>K Datasheet</b>                                               | <b>35</b> |
| 568 | K.1 Motivation . . . . .                                         | 35        |
| 569 | K.2 Composition . . . . .                                        | 35        |
| 570 | K.3 Collection . . . . .                                         | 38        |
| 571 | K.4 PREPROCESSING / CLEANING / LABELING . . . . .                | 39        |
| 572 | K.5 USES . . . . .                                               | 40        |
| 573 | K.6 DISTRIBUTION . . . . .                                       | 41        |
| 574 | K.7 MAINTENANCE . . . . .                                        | 42        |

575 **A INQUIRE Query Examples**

576 Below we include several queries from INQUIRE with their broad justification, small number of  
577 examples of relevant and not relevant images, and a detailed explanation of each image's relevance.

**Q California Condor tagged with green 26**

California condors were extinct in the wild before their re-introduction in 1992. To track the movements of individuals, each condor has identifiable tags placed by biologists. Identifying individual condors based on community volunteer photos can provide evidence of their movement, behavior, and social interactions.

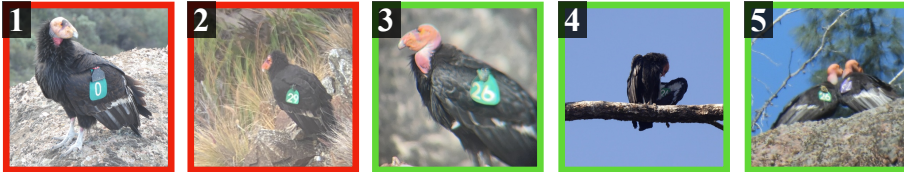

**Explanation:** (1) and (2) have green tags with numbers 0 and 29, respectively. (3), (4), and (5) all show a green tag 26, indicating that these are relevant.

**Q Moorish Gecko with regenerated tail**

This query is useful for studying tail autotomy and regeneration in geckos. Moorish geckos can regenerate their tail, but the regenerated tail will not be the same as the original: they do not grow tubercles so they appear smooth instead of ridged.

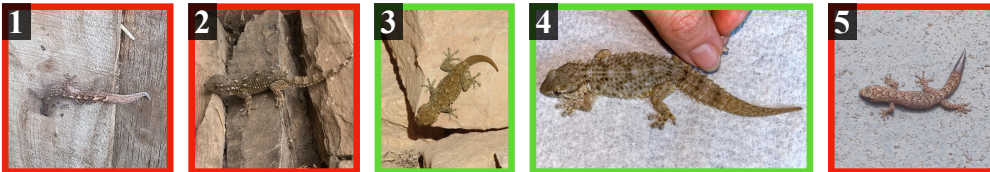

**Explanation:** (1) and (5) have regenerated tails, but are not Moorish geckos. (2) is a Moorish gecko, but does not have a regenerated tail as evidenced by ridges all the way down the length of the tail. Finally, (3) and (4) are both Moorish geckos and have sections of their tails that appear entirely smooth, indicating that they are regenerated.

**Q Everted osmeterium**

Swallowtail butterfly (Papilionidae) larvae have osmeterium, a unique defensive organ that is everted in response to threats. This organ has a few defensive uses: it secretes an acidic mixture that can deter threats, mimics a forked tongue to perhaps appear like a snake, and is brightly colored as a possible aposematic warning.

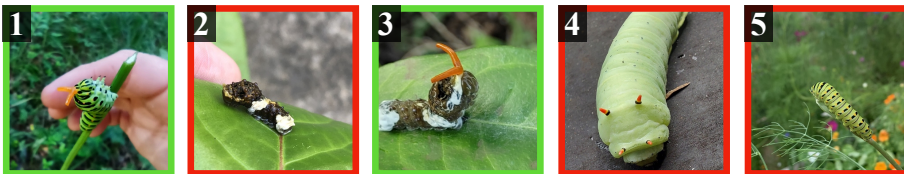

**Explanation:** (1) and (3) are correctly retrieved examples of swallowtail larvae at different life stages with everted osmeterium. (2) and (5) are also swallowtail larvae, but their osmeterium are not everted. (4) is a tulip-tree silk moth, which has four orange-red spurs on its head that are not osmeterium.

Q A godwit performing distal rhynchokinesis

Distal rhynchokinesis is an ability possessed by some long-billed shorebirds characterized by bending of the upper mandible. While it is hypothesized that this ability can help capture more feed when the birds feed by probing their beak in the mud, the functionality and evolutionary significance is not clear.

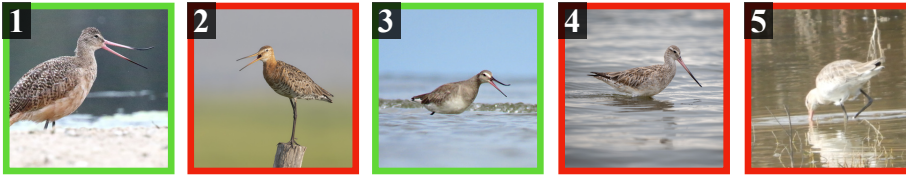

**Explanation:** (1) and (3) show pictures of godwits performing distal rhynchokinesis, as indicated by the upwards-bending upper beak. (2) shows a godwit with an open beak, but as the upper beak is straight, it is not performing distal rhynchokinesis. (4) shows a godwit with a straight, closed beak. (5) shows a godwit probing, so it not relevant as we can not infer if it is performing distal rhynchokinesis.

Q Strawberry poison-dart frog with the "la gruta" color morph from Isla Colon

Strawberry poison-dart frogs are known for their numerous color morphs, such as the common "blue jeans" morph with a red body with blue legs. Geographically isolated groups of frogs have extreme variability in coloration, but the reasons and mechanisms behind this are not clear, such as the importance of sexual selection of aposematic signaling. One such example is the "la gruta" color morph from Isla Colon, with a yellow-green base, possibly blue-ish legs, and dark dots.

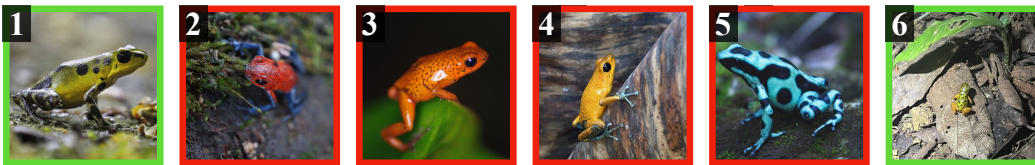

**Explanation:** (1) and (6) both show the "la gruta" morph with the characteristic yellow-green coloring and dark dots. (2) is the common "blue jeans" morph with a red both and blue legs. (3) and (4) are both different color morphs, while (5) is a Green and black poison dart frog, which is a different species.

Q Redwood trees with fire scars

Redwood trees like coast redwoods and giant sequoias are adapted to withstand fires, but forest mismanagement has led to fires with unprecedented intensity. Pictures of their fire scars can help understand the impacts of wildfires on tree resilience, and fresh growth next to charred bark indicates that a tree has grown since the last fire. Fire also plays an important role in redwood reproduction, including opening up their cones and clearing the forest floor of competitive vegetation. Fire scars appear on redwood trees as blackened bark.

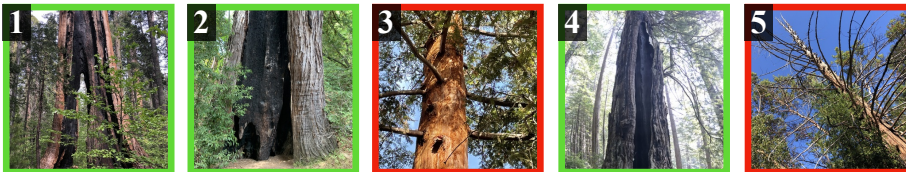

**Explanation:** All of these pictures show coast redwoods or giant sequoias. (1), (2) and (4) show fire scars, as evidenced by the blackened bark inside the trees. (3) Does not show evidence of fire scars, and (5) shows a tree which may have fallen over, but also does not show evidence of fire scars.

578 **B Additional Details about INQUIRE**

579 In Figure A1 we show histograms representing the number of labeled images and relevant images  
 580 for each query from INQUIRE. We see that there is a long-tailed distribution for the number of  
 581 relevant images per query, which ranges from 1 to 1150, with an average of 123 and median of 46  
 582 relevant images per query. In total, we labeled 149,022 images, of which 24,650 were relevant to their  
 583 queries (or 24,336 unique images). As we use species filters and other steps to ensure our labeling is  
 584 comprehensive (see Appendix H), we treat the rest of the iNat24 images as not relevant. This means  
 585 that along with the existing image labels, we also have about 5 million weak negative labels per query,  
 586 for a total of 1 billion weak labels.

587 In Table A1 we provide a breakdown of the number of queries of each of the four main types,  
 588 including the average number of relevant images for each query. We note that this number varies  
 589 widely. Species queries tend to have many relevant labels, while queries in categories like "Tracking  
 590 and Identification" tend to have few relevant images.

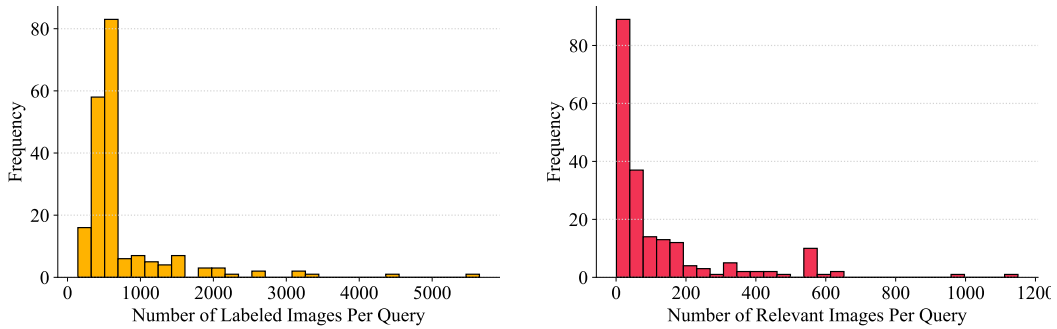

Figure A1: Collecting INQUIRE involved labeling a combined total of 149,022 candidate images across all 200 queries, yielding 24,650 relevant matches. These histograms show the number of images labeled per query, and the number of those that were relevant.

Table A1: INQUIRE queries can be grouped in to 16 categories. Here we provide ta list of these categories, the number of queries in each, and an example.

| Supercategory | Category                         | # Queries | Avg # Relevant | Example                                          |
|---------------|----------------------------------|-----------|----------------|--------------------------------------------------|
| Appearance    | Health and Disease               | 21        | 85             | black knot caused by a fungal pathogen           |
|               | Life Cycle and Development       | 14        | 86             | juvenile bald eagle                              |
|               | Sex identification               | 14        | 136            | fiddler crab with an oversized chela             |
|               | Tracking and Identification      | 13        | 27             | California Condor tagged with green 26           |
|               | Unique appearances or morphs     | 13        | 74             | albino american robin                            |
| Behavior      | Cooperative and Social Behaviors | 18        | 25             | macaques engaging in mutual grooming behavior    |
|               | Defensive and Survival Behaviors | 11        | 47             | everted osmeterium                               |
|               | Feeding and Hydration            | 24        | 27             | Black Skimmer performing skimming                |
|               | Mating, Courtship, Reproduction  | 12        | 32             | Alligator lizards mating                         |
|               | Miscellaneous Behavior           | 8         | 127            | spider monkey using its tail to hang on a branch |
| Context       | Animal Structures and Habitats   | 7         | 20             | a beaver dam across a stream                     |
|               | Collected Specimens              | 12        | 34             | measuring the body dimensions of a bee           |
|               | Human Impact                     | 17        | 46             | dehorned rhino                                   |
|               | Miscellaneous Context            | 13        | 131            | Mushrooms growing in a fairy ring formation      |
|               | Parasitism and Symbiosis         | 17        | 33             | Sharks with remoras attached                     |
| Species       | Species ID                       | 25        | 419            | blue dragon nudibranch                           |



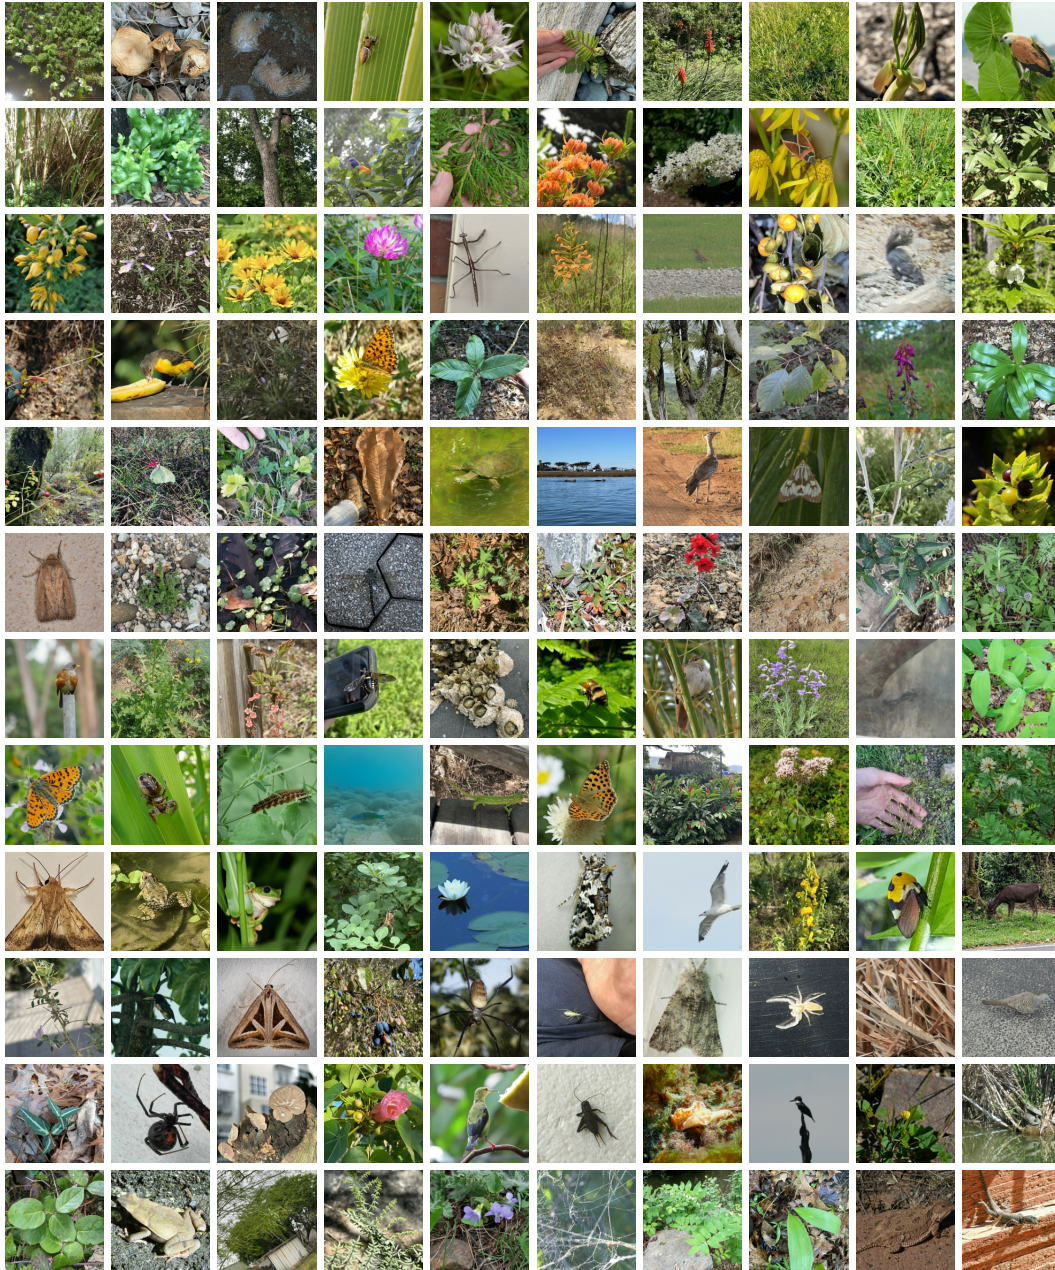

Figure A2: Random images from the iNat24 dataset. iNat24 contains five million images from 10,000 species classes.

591 **C Additional Details about iNat24**

592 iNat24 contains 4,813,543 images for 9,959 species. Figure [A2](#) shows examples of randomly chosen  
 593 images from the dataset.

594 **D Geographic Range of INQUIRE and iNat24**

595 In Figure [A3](#) we show the geographic range of iNat24 observations and image from INQUIRE judged  
 596 as relevant. We can see that the distribution of both is similar, which demonstrates that INQUIRE  
 597 queries do not exhibit a strong geographic bias as compared to the iNat24 source data in the images

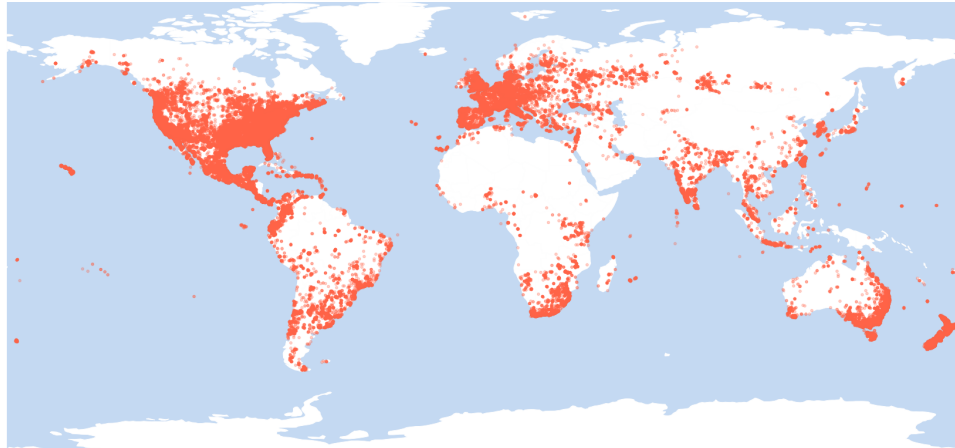

(a) Geographic distribution of all iNat24 images.

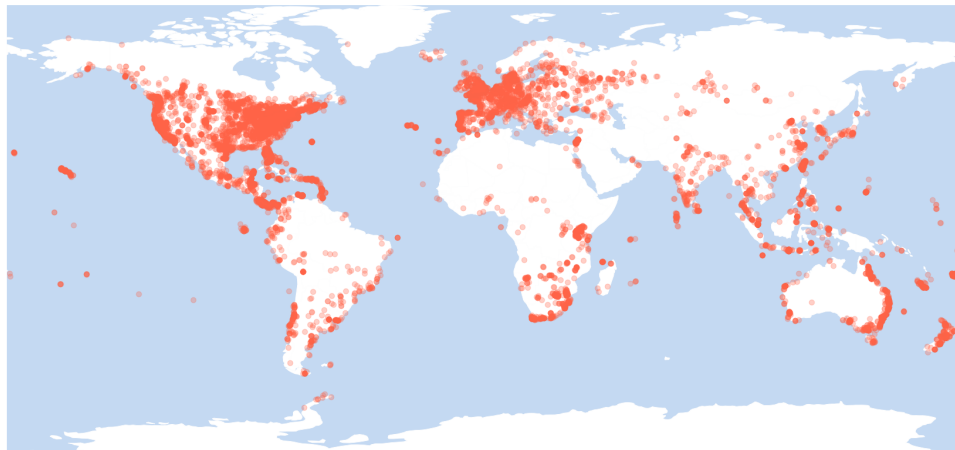

(b) Geographic distribution of the iNat24 images marked relevant for an INQUIRE query.

Figure A3: Here we compare the spatial distribution of the images in iNat24 to the relevant images in queries from INQUIRE. We can see that the distribution of both is similar. Both exhibit a bias towards North America, Europe, and parts of Australasia which is reflective of the spatial biases present in the iNaturalist platform.

598 that the queries correspond to. However, both exhibit a bias towards North America, Europe, and  
 599 parts of Australasia which is reflective of the spatial biases present in the iNaturalist platform.

## 600 **E Additional Results**

601 In this section we provide detailed evaluation results for a range of additional CLIP models. We also  
 602 break down results in detail by category, making it more clear what the strengths and weaknesses of  
 603 each model are. These details results are shown in Table [A2](#) for INQUIRE-FULLRANK and Table [A3](#)  
 604 for INQUIRE-RERANK.

## 605 **F Computational Efficiency**

606 **Embedding Generation.** The computational efficiency of a retrieval method is key to its real-world  
 607 viability. In Figure [A4](#) we estimate the computational cost for selected CLIP retrieval methods. Here,

Table A2: Detailed evaluation of INQUIRE-FULLRANK by category for a variety of embedding models. Results are reported in AP@50.

| Model                | Sp.         | Behavior    |                        |                                  |                                  |                                 |                       |              | Context               |                                |                          |                     | Appearance                  |                    |                              |                    |
|----------------------|-------------|-------------|------------------------|----------------------------------|----------------------------------|---------------------------------|-----------------------|--------------|-----------------------|--------------------------------|--------------------------|---------------------|-----------------------------|--------------------|------------------------------|--------------------|
|                      |             | Species ID  | Miscellaneous Behavior | Defensive and Survival Behaviors | Cooperative and Social Behaviors | Mating, Courtship, Reproduction | Feeding and Hydration | Human Impact | Miscellaneous Context | Animal Structures and Habitats | Parasitism and Symbiosis | Collected Specimens | Tracking and Identification | Health and Disease | Unique appearances or morphs | Sex identification |
| bioclip              | 21.1        | 2.4         | 0.0                    | 0.4                              | 0.1                              | 0.2                             | 0.0                   | 9.9          | 0.0                   | 0.8                            | 0.1                      | 0.6                 | 0.7                         | 0.4                | 7.1                          | 2.4                |
| wildclip-t1t7-lwf    | 13.1        | 14.5        | 4.7                    | 4.5                              | 6.7                              | 7.2                             | 10.2                  | 5.6          | 8.6                   | 3.5                            | 2.8                      | 5.2                 | 8.9                         | 14.5               | 2.9                          | 0.8                |
| wildclip-t1          | 13.2        | 14.4        | 7.0                    | 8.2                              | 3.1                              | 8.4                             | 9.6                   | 6.4          | 10.4                  | 4.0                            | 5.0                      | 4.0                 | 7.3                         | 10.0               | 3.6                          | 1.0                |
| rn50                 | 13.8        | 17.0        | 5.8                    | 6.3                              | 5.4                              | 6.2                             | 6.5                   | 14.2         | 6.3                   | 4.9                            | 9.2                      | 1.9                 | 7.2                         | 15.4               | 2.9                          | 1.0                |
| vit-b-32             | 16.1        | 15.7        | 5.4                    | 7.1                              | 7.0                              | 6.2                             | 9.9                   | 11.7         | 6.3                   | 6.1                            | 10.9                     | 4.1                 | 4.8                         | 12.7               | 6.5                          | 1.1                |
| vit-b-16             | 19.0        | 17.0        | 9.6                    | 11.7                             | 8.8                              | 8.4                             | 15.2                  | 9.0          | 13.4                  | 5.8                            | 14.2                     | 9.1                 | 9.6                         | 23.3               | 6.6                          | 0.8                |
| rn50x16              | 23.3        | 23.9        | 15.2                   | 15.1                             | 13.1                             | 15.2                            | 16.8                  | 12.4         | 13.3                  | 8.1                            | 17.2                     | 12.0                | 12.4                        | 16.7               | 8.3                          | 2.4                |
| vit-l-14             | 23.6        | 20.5        | 13.9                   | 16.7                             | 20.4                             | 9.9                             | 20.3                  | 14.0         | 20.1                  | 9.4                            | 5.8                      | 16.1                | 14.3                        | 28.6               | 11.6                         | 4.3                |
| vit-b-16-dfn         | 28.3        | 26.5        | 14.0                   | 12.7                             | 15.3                             | 19.1                            | 19.3                  | 16.7         | 21.5                  | 9.6                            | 12.8                     | 10.5                | 9.4                         | 20.4               | 14.8                         | 5.1                |
| vit-l-14-dfn         | 40.9        | 29.3        | 22.3                   | 22.8                             | 29.2                             | 21.3                            | 28.1                  | 30.2         | 31.5                  | 22.7                           | 18.7                     | 18.2                | 18.5                        | 29.5               | 20.4                         | 5.2                |
| siglip-vit-l-16-384  | 44.5        | 46.4        | 25.8                   | 39.6                             | 33.9                             | 24.1                            | 45.3                  | 34.2         | 28.7                  | 24.4                           | 32.6                     | 26.9                | <b>29.3</b>                 | 26.6               | 24.0                         | 13.0               |
| siglip-so400m-14-384 | 42.6        | 48.5        | 29.0                   | <b>42.5</b>                      | 29.8                             | <b>30.0</b>                     | <b>45.8</b>           | 34.0         | 32.9                  | 24.8                           | <b>43.0</b>              | <b>42.2</b>         | 29.2                        | <b>38.4</b>        | 25.6                         | <b>18.0</b>        |
| vit-h-14-378         | <b>52.7</b> | <b>51.0</b> | <b>35.5</b>            | 41.2                             | <b>44.4</b>                      | 29.8                            | 45.7                  | <b>42.5</b>  | <b>38.0</b>           | <b>26.1</b>                    | 27.2                     | 30.2                | 27.6                        | 26.0               | <b>28.4</b>                  | 15.7               |

Table A3: Detailed evaluation of INQUIRE-RERANK by category for a variety of embedding models. Results are reported in AP.

| Model                | Sp.         | Behavior    |                        |                                  |                                  |                                 |                       |              | Context               |                                |                          |                     | Appearance                  |                    |                              |                    |
|----------------------|-------------|-------------|------------------------|----------------------------------|----------------------------------|---------------------------------|-----------------------|--------------|-----------------------|--------------------------------|--------------------------|---------------------|-----------------------------|--------------------|------------------------------|--------------------|
|                      |             | Species ID  | Miscellaneous Behavior | Defensive and Survival Behaviors | Cooperative and Social Behaviors | Mating, Courtship, Reproduction | Feeding and Hydration | Human Impact | Miscellaneous Context | Animal Structures and Habitats | Parasitism and Symbiosis | Collected Specimens | Tracking and Identification | Health and Disease | Unique appearances or morphs | Sex identification |
| bioclip              | <b>41.1</b> | 45.4        | 20.7                   | 26.7                             | 33.7                             | 21.8                            | 27.5                  | 43.2         | 16.1                  | 29.6                           | 39.4                     | 20.4                | 26.1                        | 21.5               | <b>39.7</b>                  | 32.5               |
| wildclip-t1t7-lwf    | 37.4        | 55.7        | 36.2                   | 31.4                             | 31.0                             | 21.3                            | 47.8                  | 38.9         | 18.5                  | 26.0                           | 37.5                     | 23.8                | 30.8                        | 34.6               | 26.6                         | 29.8               |
| wildclip-t1          | 34.3        | 55.3        | 39.1                   | 34.7                             | 26.4                             | 21.2                            | 46.8                  | 41.7         | 26.4                  | 26.6                           | 37.3                     | 22.5                | 32.3                        | 31.1               | 28.7                         | 27.0               |
| rn50                 | 35.2        | 55.7        | 25.2                   | 31.8                             | 29.8                             | 24.2                            | 36.4                  | 45.0         | 23.2                  | 29.4                           | 42.5                     | 19.5                | 32.1                        | 37.9               | 27.4                         | 28.4               |
| vit-b-32             | 37.0        | 53.9        | 26.3                   | 32.7                             | 28.3                             | 24.8                            | 43.2                  | 44.8         | 22.2                  | 31.5                           | 41.5                     | 21.4                | 28.6                        | 34.2               | 25.3                         | 25.9               |
| vit-b-16             | 37.1        | 58.8        | 33.2                   | 35.9                             | 30.7                             | 24.5                            | 46.4                  | 42.0         | 23.5                  | 27.6                           | 43.3                     | 31.4                | 31.1                        | 42.0               | 24.0                         | 25.9               |
| rn50x16              | 39.8        | 59.0        | 34.4                   | 35.4                             | 33.1                             | 33.2                            | 46.6                  | 47.9         | 33.1                  | 29.2                           | 47.5                     | 32.8                | 35.3                        | 43.4               | 23.0                         | 27.6               |
| vit-b-16-dfn         | 31.5        | 53.0        | 32.7                   | 33.3                             | 36.0                             | 33.5                            | 47.0                  | 40.0         | 24.1                  | 29.8                           | 39.4                     | 29.6                | 28.0                        | 36.3               | 23.2                         | 29.6               |
| vit-l-14             | 37.6        | 55.0        | 34.4                   | 41.8                             | 38.6                             | 30.6                            | 53.8                  | 48.7         | 36.2                  | 28.4                           | 37.5                     | 36.3                | 37.1                        | 49.8               | 21.5                         | 29.5               |
| vit-l-14-dfn         | 33.4        | 61.1        | 40.9                   | 39.8                             | 45.8                             | 33.8                            | 52.4                  | 45.8         | 30.0                  | 39.5                           | 40.5                     | 37.5                | 32.8                        | 48.1               | 28.5                         | 28.6               |
| siglip-vit-l-16-384  | 34.7        | <b>71.9</b> | 47.2                   | 54.8                             | <b>55.9</b>                      | 38.6                            | 63.3                  | 55.9         | 37.2                  | <b>42.2</b>                    | 56.2                     | 51.0                | <b>44.4</b>                 | 44.7               | 31.2                         | 38.7               |
| siglip-so400m-14-384 | 38.8        | 70.7        | 49.0                   | <b>56.6</b>                      | 51.1                             | <b>43.2</b>                     | <b>66.1</b>           | <b>56.1</b>  | 37.2                  | 40.4                           | <b>62.3</b>              | <b>66.7</b>         | 44.0                        | <b>65.3</b>        | 30.2                         | <b>49.6</b>        |
| vit-h-14-378         | 28.6        | 70.0        | <b>55.1</b>            | 52.0                             | 53.8                             | 39.8                            | 60.8                  | 44.1         | <b>37.4</b>           | 40.2                           | 45.3                     | 51.6                | 39.6                        | 41.2               | 25.3                         | 32.0               |

608 the computational cost represents the total computational cost of generating all CLIP embeddings  
609 (the per-inference cost is provided by OpenCLIP [31]), and dividing by 200, the number of queries.  
610 However, we note that in practice, once all image embeddings are pre-computed and stored in an  
611 efficient nearest-neighbors index (e.g., Faiss [23]), each query takes milliseconds and thus its search  
612 cost is near-zero. The only significant computational cost will be that of performing inference on the  
613 query via the text encoder.

614 **Scaling Laws.** Figure A4-left also shows diminishing returns in AP@50 as the model size, and  
615 thus the computational cost, increases. When we plot the same data using a log-scaled x-axis in  
616 Figure A4-right, we observe a roughly linear trend between the log-scaled computational cost and the  
617 AP@50. While further study is required to fully characterize this particular trend, this result shows  
618 evidence of power law scaling similar to other machine learning tasks [16].

619 **Computational Resources Used.** All experiments we performed on A100 GPUs.



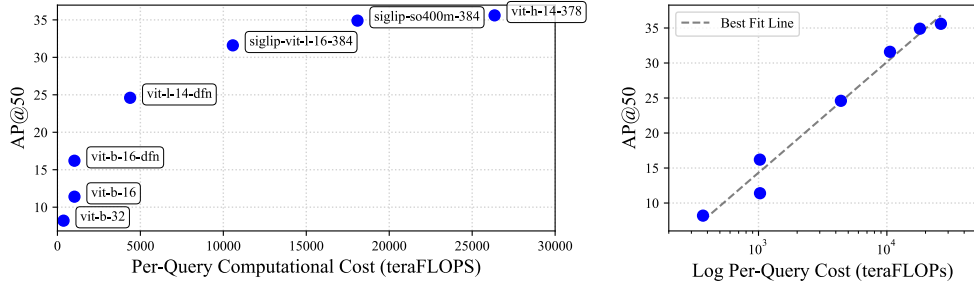

Figure A4: Computation cost of different CLIP models plotted against their performance on INQUIRE full dataset retrieval.

## 620 G Evaluation Metrics

621 Our primary evaluation metric is Average Precision at  $k$  ( $AP@k$ ). We further report the Normalized  
 622 Discounted Cumulative Gain (nDCG) and Mean Reciprocal Rank (MRR). While these metrics have  
 623 been commonly used to evaluate text retrieval [71; 18], they have not found use in image retrieval  
 624 due to the nonexistence of benchmarks like INQUIRE containing many relevant images for retrieval,  
 625 rather than just one. Thus, we include them in our analysis to encourage their use in future image  
 626 retrieval research. We note that the utilized  $AP@k$  metric uses a modified normalization factor suited  
 627 to the retrieval setting. Existing image retrieval benchmarks typically evaluate using the  $recall@k$   
 628 metric (e.g., [40]), measuring if any of the top  $k$  images are relevant. While this makes sense in the  
 629 setting where just one image is relevant, INQUIRE has potentially many relevant images and thus, we  
 630 employ metrics that measure both relevance and ranking of retrievals. More detailed discussion about  
 631 the metrics we used is provided below.

632 **Average Precision at  $k$ .** Average Precision (AP) is a well-known metric computed by taking the  
 633 weighted mean of precision scores at a set of thresholds. This metric has been adapted to the retrieval  
 634 setting, where it possible to calculate the Average Precision at  $k$  ( $AP@k$ ) among just the top  $k$   
 635 retrieved items. Since calculating  $AP@k$  requires both the relevance and position of the top  $k$  items,  
 636  $AP@k$  may be preferred over Precision at  $k$  ( $P@k$ ) which does not use position. A number of  $AP@k$   
 637 variants have been proposed [10; 27; 71], taking the general form:

$$AP@k = \frac{\sum_{i=1}^k P@i \cdot rel(i)}{NF} \quad (1)$$

638 where  $Pr@i$  is the precision at  $i$  (i.e., among the first  $i$  items),  $rel(i) \in \{0, 1\}$  is the binary relevance  
 639 score, and  $NF$  is a normalization factor.

640 In a typical implementation of AP we would see  $NF = r$ , the total number of relevant items in the  
 641 top  $k$ . However in a retrieval setting with a total of  $R$  relevant items, this normalization technique  
 642 creates a problematic and unintuitive situation where promoting an item into the top  $k$  retrievals can  
 643 decrease the score.

644 In particular, consider the situation where we have 100 images of which 2 are relevant and 98 are not  
 645 relevant. Using a normalization factor of  $NF = R$ , we measure  $AP@5$  for the following two top-5  
 646 retrievals:

- 647 1. Ordered retrieval relevance: (1, 0, 0, 0, 0)  $\implies AP@5 = 1$
- 648 2. Ordered retrieval relevance: (1, 0, 0, 0, 1)  $\implies AP@5 = 0.7$

649 We observe that promoting a relevant item into the top 5 resulted in a decreased  $AP@5$ , which is  
 650 undesirable. Our criteria for an  $AP@$  metric is that (1) the measure strictly increases whenever a  
 651 relevant document is promoted into the top- $k$ , and (2) the has a full range of 0 to 1. Of the range

652 of proposed AP@k variants [10; 27; 71], just [71] meets our desired criteria This modified average  
 653 precision normalizes using  $\min(k, R)$ . In the case above, we now have  $NF = \min(k, R) =$   
 654  $\min(5, 2) = 2$ , yielding:

655 1. Ordered retrieval relevance:  $(1, 0, 0, 0, 0) \implies AP@5 = 0.5$

656 2. Ordered retrieval relevance:  $(1, 0, 0, 0, 1) \implies AP@5 = 0.7$

657 Our end-to-end retrieval evaluations use AP@k with this desirable normalization factor of  $NF =$   
 658  $\min(k, R)$ . Since the reranking challenge evaluates solely using the fixed set, the normalization  
 659 factor for this challenge is always  $r$ , the number of relevant items within the top  $k$ .

660 For further discussion of Average Precision at  $k$ , we refer readers to [17].

661 **nDCG**. Normalized discounted cumulative gain is a weighted ranking metric that considers the  
 662 relative ordering of the retrieved items. To compute nDCG@k for a single query, first we compute  
 663 the discounted cumulative gain at  $k$  (DCG@K):

$$DCG_k = \sum_{i=1}^k \frac{rel(i)}{\log_2(i+1)} \quad (2)$$

664 where  $rel(i) \in \{0, 1\}$  is the binary relevance score for the  $i$ th retrieved item. Then, we define the  
 665 ideal DCG at  $k$  (IDCG@k) as the maximum achievable DCG@k:

$$IDCG_k = \sum_{i=1}^{\min(k, R)} \frac{rel(i)}{\log_2(i+1)} \quad (3)$$

666 where  $R$  is the total number of relevant items for the query. Finally, we can compute  $nDCG@k$  as

$$nDCG_k = \frac{DCG_k}{IDCG_k} \quad (4)$$

667 where the normalization by  $IDCG@k$  allows  $nDCG_k$  to range fully between the interval 0 to 1.

668 **MRR**. Mean reciprocal rank is a measure for the rank of the first correct retrieval. MRR can be  
 669 computed as

$$MRR = \frac{1}{Q} \sum_{i=1}^Q \frac{1}{rank(i)} \quad (5)$$

670 where  $Q$  is the number of queries, and  $rank(i)$  gives the rank of the first relevant retrieval for the  $i$ th  
 671 query (1 for 1st position, 2 for 2nd position, etc.). If no relevant retrievals are present in the retrieved  
 672 list, we let  $rank(i) = \infty$ , i.e.,  $1/rank(i) = 0$ .

## 673 H iNat24 Image Collection and INQUIRE Annotation Protocol

674 In this sections we describe in detail our data collection protocol for collecting the iNat24 dataset and  
 675 annotating the INQUIRE benchmark.

### 676 H.1 iNat24 Dataset Curation

677 We follow a similar paradigm used to organize the iNaturalist Competition Datasets from 2017 [69],  
 678 2018 [1], 2019 [1], and 2021 [70]. For the 2024 version we start from an iNaturalist observation  
 679 database export generated on 2023-12-30. Observations are then filtered to include only those  
 680 observed in the years 2021, 2022, or 2023. This ensures the images in iNat24 are unique and do  
 681 not overlap with images from prior dataset versions (e.g., iNat21 [70] only contains images up until  
 682 September 2020). To utilize the iNat21 taxonomy (for easy compatibility with that dataset) we detect  
 683 taxonomic changes between the iNat21 taxonomy and the iNaturalist taxonomy included in the  
 684 2023-12-30 database export. We then modify species labels (where necessary) so that observations



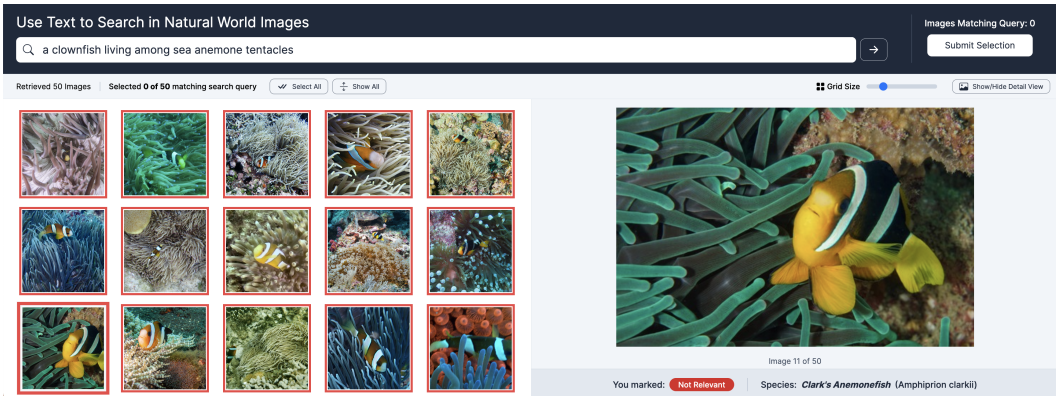

Figure A5: Here is display a screen shot of the online annotation tool we developed for annotation. The tool supports CLIP similarity search and species filtering.

685 conform to the iNat21 taxonomy. Some of these taxonomic changes can be quite complicated (splits,  
 686 merges, etc.) resulting in cases where an iNat21 species is no longer valid, however we are able to  
 687 recover 9,959 out of the original 10,000 species from iNat21. We then filter to include observations  
 688 exclusively from the iNat21 taxonomy. Additional filtering ensures that all observations have valid  
 689 metadata (i.e., location and time information) and that associated image files are not corrupted. These  
 690 steps result in a candidate set of 33M observations to sample from to build the iNat24 dataset.

691 Our process of selecting the set of images to include for each species in the iNat24 dataset deviates  
 692 from the prior dataset building schemes [69; 70]. Random sampling of observations, or even random  
 693 sampling from unique users, generates collections of images that are biased towards North America  
 694 and Europe. To decrease this bias we sample from spatio-temporal clusters of “observations groups”.  
 695 Observation groups are formed by grouping observations together if they are observed on the same  
 696 day within 10km of each other, regardless of the observer. When sampling observations for a species,  
 697 we cluster their associated observation groups using a spatio-temporal distance metric and then  
 698 sample one observation per cluster in a round-robin fashion until we hit a desired sample size. When  
 699 sampling within a cluster, we prioritize novel observation groups and novel users. We sample at  
 700 most 550 observations per species to include in iNat24. This sampling process results in a total of  
 701 4,816,146 images for 9,959 species.

702 Unlike previous versions of the iNaturalist dataset, we performed one final round of filtering to  
 703 remove images that are inappropriate for a research dataset or not relevant for the query. We use  
 704 the INQUIRE annotation process to find images containing human faces, personally identifiable  
 705 information, “empty” images, images of spectrograms, etc.. We additionally run a RetinaFace [21]  
 706 Resnet50 face detection model across the entire dataset, and manually inspect all high confidence  
 707 predictions. In total this filtered out an additional 2,603 images. The final dataset contains 4,813,543  
 708 images for 9,959 species.

709 The iNat24 dataset does not have a validation or test split, i.e., all observations are assigned to the train  
 710 split. The validation and test splits can be used from the iNat21 dataset to benchmark classification  
 711 performance. As in previous years, we keep only the primary image for each observation, and resize  
 712 all images to have a max dimension of 500px on the longest side. All images have three channels and  
 713 are stored as jpegs. We provide location, time, attribution, and licensing information in the associated  
 714 json file.

715 **H.2 Data Annotation**

716 Image annotation was performed by a carefully selected team of paid MSc students or equivalent,  
 717 many with expertise in ecology allowing for labeling of difficult queries. Annotators were instructed  
 718 to label all candidate images as either relevant (i.e., positive match) or not relevant (i.e., negative

719 match) to the query, and to mark an image as not relevant if there was reasonable doubt as to its  
720 relevance. At this stage, queries that were deemed very easy, not comprehensively labeled, or  
721 otherwise not possible to label were excluded from the benchmark.

722 The annotation itself is performed using a custom interface that we developed that shows the top  
723 retrievals given a text query and optionally allows the user to filter based on the species label. A  
724 screen shot of the tool is displayed in Figure A5. The retrievals are ordered by CLIP ViT-H/14 [24]  
725 similarity to the query text. Annotators generally label at least 500 images per query.

726 We comprehensively labeled the dataset primarily through the use of species filters for a single or a  
727 group of species. For example, to thoroughly label the query “*Black Skimmer performing skimming*”,  
728 a single species filter (Black Skimmer) was utilized while for the query “*flamingo standing on one*  
729 *leg*”, four different species filters were needed to account for all the flamingo species included in  
730 iNat24 (Lesser Flamingo, Chilean Flamingo, Greater Flamingo, and American Flamingo). Using  
731 species filters in this way allows us to sufficiently reduce the search space for these queries to  
732 comprehensively label iNat24 for all possible matches.

733 When a query corresponds to a very large number of species, or no species in particular (e.g., “*an*  
734 *image containing a photographic reference scale with a color swatch*”), we label using just the top  
735 CLIP retrievals without any filters. In this case, we tend to label a significantly larger number of  
736 images, and we label until at least 100 images in a row are negative indicating that the set of positives  
737 has been exhausted. If this condition is not met after a large number of labels, or the annotator  
738 otherwise believes that comprehensive labeling is not possible, we do not use the query. We note  
739 that the quality of our comprehensive labeling in this case is limited by the CLIP model’s ability to  
740 surface relevant positives, so any missed positives with lower relevance score could be left unlabeled.  
741 This affects only 11 of our 200 queries for which we label without species filters. This is a primary  
742 motivator behind the large number of images labeled per query (i.e., >500). However, if there were  
743 indeed missed positives, then we would expect the CLIP ViT-H/14 model used for labeling to perform  
744 unexpectedly well, as higher quality models that surface missed positive image would be penalized  
745 as these would be considered negative at evaluation time. Yet, our evaluation in Table 2 shows that  
746 SigLIP, which on OpenCLIP’s [31] retrieval evaluation performs only marginally better than CLIP  
747 ViT-H/14, achieves a comparable score. This result suggests that our dataset does not suffer from a  
748 significant missed positive issue.

749 Creating INQUIRE involved labeling 149,022 images, of which 24,650 were relevant to their queries.  
750 Labeling took place over a total of about 113 hours, so the average time spent labeling is 34 minutes  
751 per query or 2.7 seconds per image.

### 752 H.3 Data Format and Structure

753 **iNat24.** iNat24 is provided as a metadata file and a tar file containing all images. The metadata file is  
754 given in the commonly used JSON COCO format. The information in this metadata file includes each  
755 image’s ID, file path, width, height, image license, rights holder, taxonomic classification, latitude,  
756 longitude, location uncertainty, and date.

757 **INQUIRE.** The INQUIRE benchmark is provided as a two CSV files. The first is a list of queries,  
758 where each row includes fields for the query id, query text, organism category, query category type,  
759 and query category. The second file is a list of annotations, where row corresponds includes fields for  
760 the query id, image id, and relevance label. The image id can be matched to the iNat24 metadata to  
761 get additional information mentioned above, such as the taxonomy, date, and geographic location.

### 762 H.4 Ethical Considerations

763 **Copyright and Licensing.** We adhere strictly to copyright and licensing regulations. All images  
764 included in the dataset fall under a license allowing copying and redistribution. In particular, all  
765 images are licensed under one of the following: CC BY 4.0, CC BY-NC 4.0, CC BY-NC-ND 4.0, CC  
766 BY-NC-SA 4.0, CC0 1.0, CC BY-ND 4.0, or CC BY-SA 4.0.

767 **Data Privacy and Safety.** Although users approved all images considered for research use, we  
768 take further steps to ensure data privacy and safety. We filter all images for content that contains  
769 personally identifiable information or images of people. We do not exclude most images containing  
770 gore, as these are often ecologically relevant, e.g., using image of road-killed animals to assess impacts  
771 of roads on biodiversity.

772 **Violations of Rights.** We respect the rights of iNaturalist community volunteer observers by con-  
773 structing iNat2024 using only images and metadata appropriately licensed by their respective creators  
774 for copying, distribution, and non-commercial research use. Nevertheless, we bear responsibility in  
775 case of a violation of rights.

776 **Participant Risks.** We received internal ethical approval for our query collection and data labeling  
777 (Edinburgh Informatics Ethics Review Panel 951781 and MIT Committee on the Use of Humans as  
778 Experimental Subjects Protocol 2404001276).

#### 779 **H.5 Participant Compensation**

780 We hired annotators at the equivalent of \$15.50 per hour and spent a total of \$1750 on annotation.

#### 781 **H.6 Annotation Instructions**

782 The instructions provided to annotators are included below.

# Annotation Guide

March 25 2024

## Introduction

- Your goal is to label if an image matches a search query
- Images matching a query are called "relevant"
- You should make sure to label **all** the relevant images

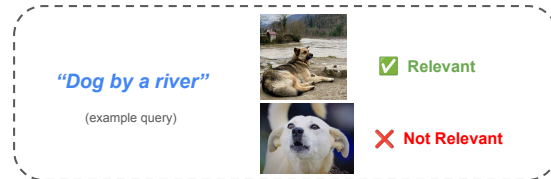

This is the annotation page

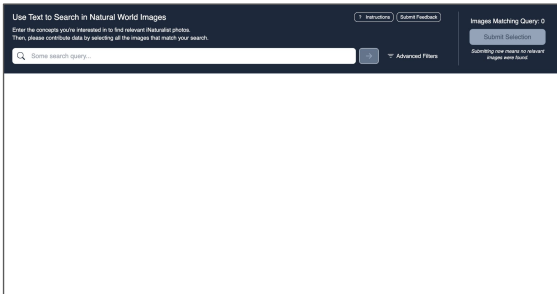

Enter a **query** here, then press enter (or the arrow button) to search.

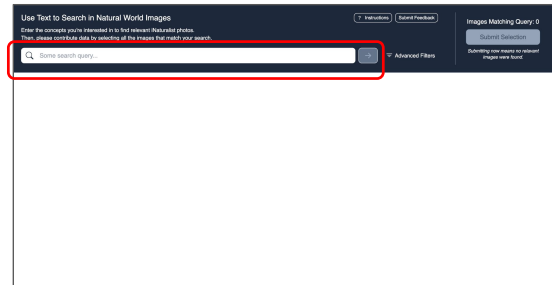

You can also add advanced **filters**. Press "Advanced filters" to open additional options (specifically, species filtering)

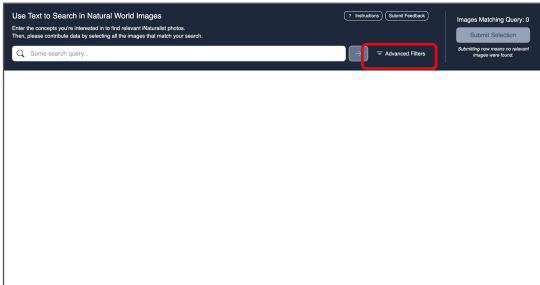

After press "Advanced filters" you'll see this extra field. Select a species by its common or scientific name

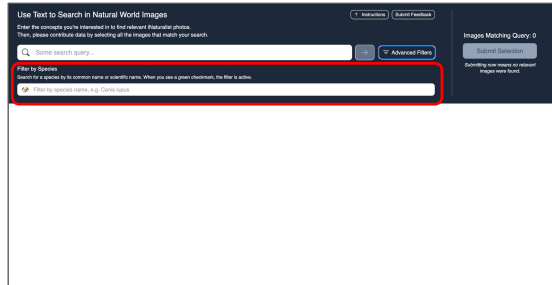

As you type, some suggestions will appear

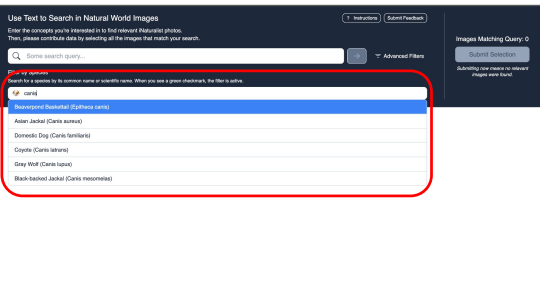

You'll know a species filter is on when there is a green checkmark and the species name is green

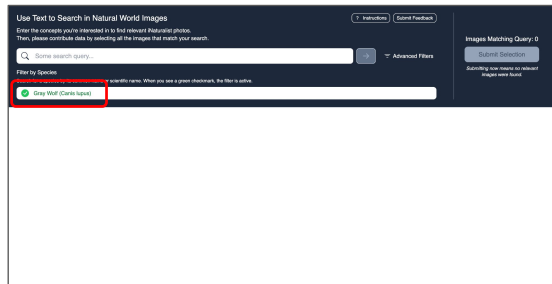

When you search, you'll see the first 50 results

The grid shows all the images

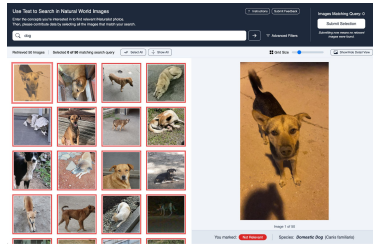

The detail view shows information about the selected image

The grid view shows all images and their labels

By default, all images are marked "Not relevant". You can toggle the label by clicking on it.

Relevant images will have a green border, while Not Relevant images will have a red border

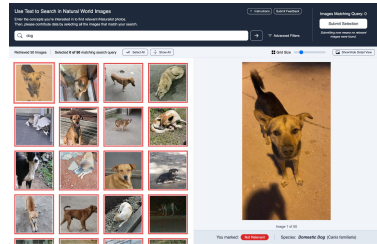

The detail view shows useful information about one image

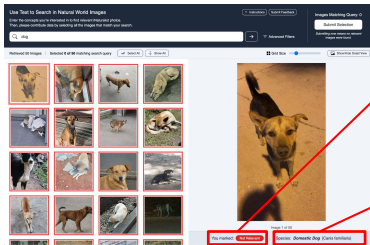

You see the image's label, which is either "Relevant" or "Not Relevant". All images start out Not Relevant

The species name is useful when the query is relevant for only some species

Keyboard shortcuts can help make labeling much faster!

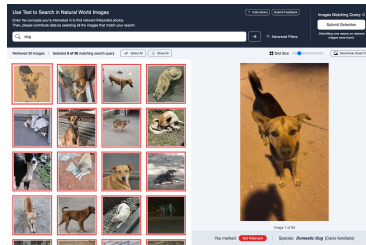

LEFT: Show the previous image

RIGHT: Show the next image

ENTER or SPACE: Toggle the label on the selected image

When you finish labeling all the images, press "Submit"

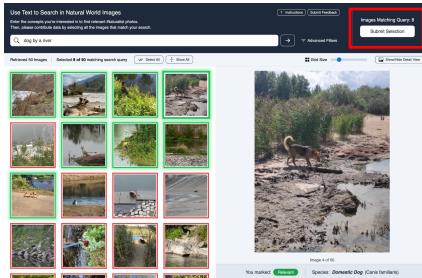

Mark that you completed labeling a query in the sheet

| Status? (Down/Up) | Labeled By | # Images Labeled | # Images Relevant | Approx Fully Labeled? | Notes |
|-------------------|------------|------------------|-------------------|-----------------------|-------|
| Down              | Eddie      | 200              | 16                | Yes                   |       |

Selected 6 of 50 matching search query

You can get these numbers from the labeling page

Do you think that you found all the relevant images from this query?

The answer is **no** if you think you'll see many more relevant images if you keep going beyond the number you already labeled

"Rules of thumb"

- Aim to label at least **500 images per task** (a task can have multiple queries)
- If a task has many queries, you can label fewer images per query (e.g. 200 images per query)
- The amount you label depends on how many relevant images you see. e.g. if you see barely any relevant images by the end of the currently open 200 images, you don't need to keep going



785 **I Multi-Modal Model Prompting Details**

786 We include the various prompts used in our evaluation of large multimodal models in Table A4.  
 787 We note that while we aim to keep the prompt broadly the same across models, they are ultimately  
 788 different due to different prompting requirements for each model.

Table A4: Format of the text prompts used by the large multimodal models.

|                |                                                                                                                                                                                                |
|----------------|------------------------------------------------------------------------------------------------------------------------------------------------------------------------------------------------|
| BLIP-2         | Does this picture show {query}?\nAnswer the question with either "Yes" or "No" and nothing else.                                                                                               |
| InstructBLIP   | Does this picture show {query}?\nAnswer the question with either "Yes" or "No" and nothing else.                                                                                               |
| LLaVA-v1.5     | USER: <image>\nDoes this picture show {query}? Answer the question with either "Yes" or "No" and nothing else.\nASSISTANT:                                                                     |
| LLaVA-v1.6-7b  | [INST] <image>\nDoes this picture show {query}? Answer the question with either "Yes" or "No" and nothing else. [/INST]                                                                        |
| LLaVA-v1.6-34b | < im_start >system\nAnswer the questions.< im_end >\n< im_start >user \n<image>\nDoes this image show "{query}"? Answer the question with either "Yes" or "No". < im_end >< im_start >answer\n |
| PaliGemma      | Q: Does this picture show {query}? Respond with yes or no.\nA:                                                                                                                                 |
| VILA-v1.5-13B  | <image>\n Does this picture show {query}?\nAnswer the question with either "Yes" or "No" and nothing else.                                                                                     |
| VILA-v1.5-40B  | <image>\n Does this picture show {query}?\nAnswer the question with either "Yes" or "No" and nothing else.                                                                                     |
| GPT-4V         | Does this picture show exactly "{query}"?\nAnswer the question with either "Yes" or "No" and nothing else.                                                                                     |
| GPT-4o         | Does this picture show exactly "{query}"?\nAnswer the question with either "Yes" or "No" and nothing else.                                                                                     |

789 **J Full List of INQUIRE Queries**

790 Table A5 lists all INQUIRE queries.

Table A5: INQUIRE includes 200 queries across a range of categories. This table lists all 200 queries along with the supercategory and category that they belong to.

| Query                                    | Supercategory | Category           |
|------------------------------------------|---------------|--------------------|
| Dead hog-nosed skunk                     | Appearance    | Health and Disease |
| sick cassava plant                       | Appearance    | Health and Disease |
| black knot caused by a fungal pathogen   | Appearance    | Health and Disease |
| beached orca                             | Appearance    | Health and Disease |
| common murre beached carcass             | Appearance    | Health and Disease |
| southern aligator lizard with cut tail   | Appearance    | Health and Disease |
| moose with hair loss                     | Appearance    | Health and Disease |
| elk with hair loss                       | Appearance    | Health and Disease |
| red fox showing signs of sarcoptic mange | Appearance    | Health and Disease |
| fire pink with dark-colored anthers      | Appearance    | Health and Disease |
| common lilac with powdery mildew         | Appearance    | Health and Disease |

|                                                                             |            |                              |
|-----------------------------------------------------------------------------|------------|------------------------------|
| Redwood tree with fire scars                                                | Appearance | Health and Disease           |
| Wolf spider with limb loss                                                  | Appearance | Health and Disease           |
| Moorish Gecko with regenerated tail                                         | Appearance | Health and Disease           |
| an immature bald eagle                                                      | Appearance | Life Cycle and Development   |
| Swallowtail butterfly caterpillar camouflaged as bird droppings             | Appearance | Life Cycle and Development   |
| A cicada in the process of shedding its exoskeleton                         | Appearance | Life Cycle and Development   |
| monkey slug caterpillar                                                     | Appearance | Life Cycle and Development   |
| laysan albatross mostly in dark mottled brown plumage                       | Appearance | Life Cycle and Development   |
| penguin during molting period                                               | Appearance | Life Cycle and Development   |
| Lilac Bonnet with edges turned up revealing its gills                       | Appearance | Life Cycle and Development   |
| Octopus Stinkhorn fungus emerging from casing                               | Appearance | Life Cycle and Development   |
| breeding adult Dunlin                                                       | Appearance | Life Cycle and Development   |
| Cooper's Hawk in adult plumage                                              | Appearance | Life Cycle and Development   |
| breeding adult Black-bellied Plover                                         | Appearance | Life Cycle and Development   |
| Cart-Rut Shell snail egg mass                                               | Appearance | Life Cycle and Development   |
| A female pheasant                                                           | Appearance | Sex identification           |
| fiddler crab with an oversized chela                                        | Appearance | Sex identification           |
| Male crimsonband wrasse                                                     | Appearance | Sex identification           |
| Eurasian Black Grouse male                                                  | Appearance | Sex identification           |
| Rusty tussock moth adult female                                             | Appearance | Sex identification           |
| male velvet ant                                                             | Appearance | Sex identification           |
| Male Xanthagrion erythroneurum                                              | Appearance | Sex identification           |
| female or immature evening grosbeak                                         | Appearance | Sex identification           |
| male common green darner                                                    | Appearance | Sex identification           |
| male ruby-throated hummingbird in flight                                    | Appearance | Sex identification           |
| female beautiful demoiselle                                                 | Appearance | Sex identification           |
| male Northern Elephant Seal                                                 | Appearance | Sex identification           |
| adult male Misumena vatia                                                   | Appearance | Sex identification           |
| Tagged swan                                                                 | Appearance | Tracking and Identification  |
| a north island robin tagged with colored leg bands                          | Appearance | Tracking and Identification  |
| California Condor tagged with green 26                                      | Appearance | Tracking and Identification  |
| a lion with a collar around its neck                                        | Appearance | Tracking and Identification  |
| elephant with radio collar                                                  | Appearance | Tracking and Identification  |
| Cheetah with radio collar                                                   | Appearance | Tracking and Identification  |
| Rhino with ear notches                                                      | Appearance | Tracking and Identification  |
| an image showing a humpback whale fluke with clearly identifiable markings  | Appearance | Tracking and Identification  |
| A grey-tailed tattler with leg bands                                        | Appearance | Tracking and Identification  |
| Black Skimmer with a leg band                                               | Appearance | Tracking and Identification  |
| a bighorn sheep with a tracking collar around its neck                      | Appearance | Tracking and Identification  |
| Tortoise with a radio tag on its shell                                      | Appearance | Tracking and Identification  |
| a male mandarin duck in breeding plumage                                    | Appearance | Unique appearances or morphs |
| Strawberry poison-dart frog with the "la gruta" color morph from Isla Colon | Appearance | Unique appearances or morphs |
| Melanistic leopard                                                          | Appearance | Unique appearances or morphs |
| Melanistic jaguar                                                           | Appearance | Unique appearances or morphs |
| a peach-faced Lovebird with the turquoise mutation                          | Appearance | Unique appearances or morphs |
| albino american robin                                                       | Appearance | Unique appearances or morphs |
| A stoat with mainly white fur                                               | Appearance | Unique appearances or morphs |

|                                                                                    |            |                                  |
|------------------------------------------------------------------------------------|------------|----------------------------------|
| fire salamander with a barred color pattern                                        | Appearance | Unique appearances or morphs     |
| brown-colored black bear                                                           | Appearance | Unique appearances or morphs     |
| eastern gray squirrel displaying melanistic pelage                                 | Appearance | Unique appearances or morphs     |
| Fly Agaric in yellow form                                                          | Appearance | Unique appearances or morphs     |
| Axanthism in a green frog ( <i>Lithobates clamitans</i> )                          | Appearance | Unique appearances or morphs     |
| A meadowlark vocalizing                                                            | Behavior   | Cooperative and Social Behaviors |
| A close-up of an ant carrying a leaf                                               | Behavior   | Cooperative and Social Behaviors |
| cheetah with cubs                                                                  | Behavior   | Cooperative and Social Behaviors |
| grebe with babies on its back                                                      | Behavior   | Cooperative and Social Behaviors |
| macaques engaging in mutual grooming behavior                                      | Behavior   | Cooperative and Social Behaviors |
| A tamandua anteater pup clinging to its mother's back                              | Behavior   | Cooperative and Social Behaviors |
| Emergence of large colony of mexican free-tailed bats                              | Behavior   | Cooperative and Social Behaviors |
| a herd of more than 10 impalas                                                     | Behavior   | Cooperative and Social Behaviors |
| canada geese flying in v-formation                                                 | Behavior   | Cooperative and Social Behaviors |
| mountain goat climbing rocky outcrops with its young                               | Behavior   | Cooperative and Social Behaviors |
| jungle babblers allopreening                                                       | Behavior   | Cooperative and Social Behaviors |
| a sandhill crane couple with their chicks                                          | Behavior   | Cooperative and Social Behaviors |
| couple of black-bellied whistling ducks with their youngs sharing parenting duties | Behavior   | Cooperative and Social Behaviors |
| Eurasian Blackbird vocalizing                                                      | Behavior   | Cooperative and Social Behaviors |
| Sage Thrasher vocalizing                                                           | Behavior   | Cooperative and Social Behaviors |
| male Red-winged Blackbird vocalizing                                               | Behavior   | Cooperative and Social Behaviors |
| picture showing more than fifty Velvety Tree Ants                                  | Behavior   | Cooperative and Social Behaviors |
| picture showing more than fifty Mediterranean Acrobat Ants                         | Behavior   | Cooperative and Social Behaviors |
| Wolf spider carrying spiderlings on its back                                       | Behavior   | Cooperative and Social Behaviors |
| Scorpion with young on its back                                                    | Behavior   | Cooperative and Social Behaviors |
| Two giraffes                                                                       | Behavior   | Cooperative and Social Behaviors |
| A mongoose standing upright alert                                                  | Behavior   | Defensive and Survival Behaviors |
| Gazelle being vigilant/looking around                                              | Behavior   | Defensive and Survival Behaviors |
| everted osmeterium                                                                 | Behavior   | Defensive and Survival Behaviors |
| vigilant prairie dog stands guard                                                  | Behavior   | Defensive and Survival Behaviors |
| Inflated pufferfish                                                                | Behavior   | Defensive and Survival Behaviors |
| killdeer feigning injury                                                           | Behavior   | Defensive and Survival Behaviors |
| white-tailed deer flagging its tail                                                | Behavior   | Defensive and Survival Behaviors |
| white-tailed deer lifting forefoot for foot-stomp                                  | Behavior   | Defensive and Survival Behaviors |
| moray eel with open mouth poking head out of burrows or crevices                   | Behavior   | Defensive and Survival Behaviors |
| puffins carrying food                                                              | Behavior   | Feeding and Hydration            |
| black-winged kite carrying prey in its talons                                      | Behavior   | Feeding and Hydration            |
| parrotfish feeding                                                                 | Behavior   | Feeding and Hydration            |
| Elephants at a watering hole                                                       | Behavior   | Feeding and Hydration            |
| A male and female cardinal sharing food                                            | Behavior   | Feeding and Hydration            |
| hyenas eating a kill                                                               | Behavior   | Feeding and Hydration            |
| A godwit performing distal rhynchokinesis                                          | Behavior   | Feeding and Hydration            |
| Black Skimmer performing skimming                                                  | Behavior   | Feeding and Hydration            |
| fruit bat eating fruit upside down                                                 | Behavior   | Feeding and Hydration            |
| Honey Bee carrying pollen baskets                                                  | Behavior   | Feeding and Hydration            |
| macaque breastfeeding its young                                                    | Behavior   | Feeding and Hydration            |
| great golden digger wasp carrying an orthopteron                                   | Behavior   | Feeding and Hydration            |

|                                                                    |          |                                 |
|--------------------------------------------------------------------|----------|---------------------------------|
| red-tailed hawk perched on a utility pole                          | Behavior | Feeding and Hydration           |
| blue jay eating whole peanuts                                      | Behavior | Feeding and Hydration           |
| water snake feeding on fish                                        | Behavior | Feeding and Hydration           |
| Yellow-faced Honeyeater in birdbath                                | Behavior | Feeding and Hydration           |
| Northern Mockingbird carrying out its food                         | Behavior | Feeding and Hydration           |
| Leafhopper Assassin Bug predating lady beetle                      | Behavior | Feeding and Hydration           |
| Milkweed Assassin Bug predating a bee or wasp                      | Behavior | Feeding and Hydration           |
| Surgeonfish grazing on algae                                       | Behavior | Feeding and Hydration           |
| Butterflyfish feeding on brain coral                               | Behavior | Feeding and Hydration           |
| A peacock male displaying its feathers                             | Behavior | Mating, Courtship, Reproduction |
| A glowworm exhibiting bioluminescence                              | Behavior | Mating, Courtship, Reproduction |
| A male frigatebird with an inflated throat pouch                   | Behavior | Mating, Courtship, Reproduction |
| Elk bugling during the rut                                         | Behavior | Mating, Courtship, Reproduction |
| baboon with swollen red bottom                                     | Behavior | Mating, Courtship, Reproduction |
| pair of great crested grebes potentially performing the weed dance | Behavior | Mating, Courtship, Reproduction |
| male smooth newt with developed crest                              | Behavior | Mating, Courtship, Reproduction |
| firebugs mating                                                    | Behavior | Mating, Courtship, Reproduction |
| Hübner's Wasp Moth mating                                          | Behavior | Mating, Courtship, Reproduction |
| Alligator lizards mating                                           | Behavior | Mating, Courtship, Reproduction |
| Water Frogs in amplexus position                                   | Behavior | Mating, Courtship, Reproduction |
| Dolphins performing acrobatics                                     | Behavior | Miscellaneous Behavior          |
| elephant covered in mud or dirt                                    | Behavior | Miscellaneous Behavior          |
| spider monkey using its tail to hang on a branch                   | Behavior | Miscellaneous Behavior          |
| flamingo standing on one leg                                       | Behavior | Miscellaneous Behavior          |
| African Buffalo wallowing in mud                                   | Behavior | Miscellaneous Behavior          |
| Eastern Red Bat in flight                                          | Behavior | Miscellaneous Behavior          |
| Big Brown Bat roosting                                             | Behavior | Miscellaneous Behavior          |
| Young sea turtles heading towards the ocean                        | Behavior | Miscellaneous Behavior          |
| A Gila Woodpecker inside its nest in a Saguaro cactus cavity       | Context  | Animal Structures and Habitats  |
| A satin bowerbird's bower ornamented with blue objects             | Context  | Animal Structures and Habitats  |
| potter wasp nest                                                   | Context  | Animal Structures and Habitats  |
| Hamerkop collecting nesting material                               | Context  | Animal Structures and Habitats  |
| male purple finch on a nest box                                    | Context  | Animal Structures and Habitats  |
| a beaver dam across a stream                                       | Context  | Animal Structures and Habitats  |
| measuring the body dimensions of a bee                             | Context  | Collected Specimens             |
| camera trap photo of a cougar captured in the day-time             | Context  | Collected Specimens             |
| camera trap photo of a bobcat captured in the night-time           | Context  | Collected Specimens             |
| camera trap photo of a stag red deer                               | Context  | Collected Specimens             |
| camera trap photo of chital with its head down                     | Context  | Collected Specimens             |
| camera trap photo of a springbok drinking water                    | Context  | Collected Specimens             |
| leopard on a road                                                  | Context  | Human Impact                    |
| a hermit crab using plastic waste as a shell                       | Context  | Human Impact                    |
| Fishing net on a reef                                              | Context  | Human Impact                    |
| a possum on a power line                                           | Context  | Human Impact                    |
| elephant near a fence                                              | Context  | Human Impact                    |
| birds with wind turbines                                           | Context  | Human Impact                    |
| bird dead in front of a window                                     | Context  | Human Impact                    |
| bird caught in a net                                               | Context  | Human Impact                    |

|                                                                        |         |                          |
|------------------------------------------------------------------------|---------|--------------------------|
| dehorned rhino                                                         | Context | Human Impact             |
| brown bear near vehicle                                                | Context | Human Impact             |
| human handling a bat with bare hands                                   | Context | Human Impact             |
| raccoon observed in urban setting                                      | Context | Human Impact             |
| Maple tree with signs of tapping                                       | Context | Human Impact             |
| Mushrooms growing in a fairy ring formation                            | Context | Miscellaneous Context    |
| an image containing a photographic reference scale with a color swatch | Context | Miscellaneous Context    |
| a microscopy slide showing the cellular structure of a plant           | Context | Miscellaneous Context    |
| dorsal side of mourning cloak butterfly                                | Context | Miscellaneous Context    |
| ventral side of mourning cloak butterfly                               | Context | Miscellaneous Context    |
| Indigo Milk Cap underneath view                                        | Context | Miscellaneous Context    |
| hot lips plant with blue fruits                                        | Context | Miscellaneous Context    |
| great blue heron with visible water reflection                         | Context | Miscellaneous Context    |
| Scarlet Waxy Cap with visible gills                                    | Context | Miscellaneous Context    |
| an oxpecker on a zebra                                                 | Context | Parasitism and Symbiosis |
| bird perched on a hippo                                                | Context | Parasitism and Symbiosis |
| Sea turtle with algae on its shell                                     | Context | Parasitism and Symbiosis |
| Zebra and wildebeest grazing together                                  | Context | Parasitism and Symbiosis |
| Sharks with remoras attached                                           | Context | Parasitism and Symbiosis |
| bananaquit pollinating flower                                          | Context | Parasitism and Symbiosis |
| lorikeet pollinating flower                                            | Context | Parasitism and Symbiosis |
| a nest with eggs displaying brood parasitism by a cowbird              | Context | Parasitism and Symbiosis |
| giant resin bee feeding on sunflower                                   | Context | Parasitism and Symbiosis |
| Cat's Eye Snail covered by green algae                                 | Context | Parasitism and Symbiosis |
| Channeled Applesnail covered by green algae                            | Context | Parasitism and Symbiosis |
| Chinese Mystery Snail covered by green algae                           | Context | Parasitism and Symbiosis |
| cross orbweaver                                                        | Species | Species ID               |
| Carpobrotus ice plant                                                  | Species | Species ID               |
| Zebra Mussel                                                           | Species | Species ID               |
| Spotted Lanternfly                                                     | Species | Species ID               |
| bridal veil stinkhorn mushroom                                         | Species | Species ID               |
| Green Shore Crab                                                       | Species | Species ID               |
| Parasitic Honey Mushrooms                                              | Species | Species ID               |
| Green and black poison dart frog                                       | Species | Species ID               |
| Chain Tunicate                                                         | Species | Species ID               |
| blue dragon nudibranch                                                 | Species | Species ID               |
| close-up of shagbark hickory tree bark                                 | Species | Species ID               |
| close-up of sweet cherry tree bark                                     | Species | Species ID               |
| close-up of sugar maple leaf                                           | Species | Species ID               |
| close-up of silver maple leaf                                          | Species | Species ID               |
| Death cap mushroom                                                     | Species | Species ID               |
| Canada goldenrod ( <i>Solidago canadensis</i> )                        | Species | Species ID               |
| Japanese knotweed                                                      | Species | Species ID               |
| kahili ginger plant with open fruit capsules showing seeds             | Species | Species ID               |
| a rosy wolfsnail                                                       | Species | Species ID               |
| Purple Sea Urchin                                                      | Species | Species ID               |
| Sunflower Sea Star                                                     | Species | Species ID               |



791 **K Datasheet**

792 **K.1 Motivation**

793 **For what purpose was the dataset created?** Was there a specific task in mind? Was there a specific  
794 gap that needed to be filled? Please provide a description.

795 • The purpose of INQUIRE is to provide a challenging benchmark for text-to-image retrieval  
796 on natural world images. Prior retrieval datasets are small and do not possess a challenge  
797 for existing models, with many being adaptations of captioning datasets. These datasets also  
798 have exactly one positive match for each query, which differs significantly from real-world  
799 retrieval scenarios where many images can be matches. The initial release of INQUIRE  
800 includes 200 queries comprehensively labeled over a pool of five million natural world  
801 images. For more information see Section [3](#).

802 **Who created this dataset (e.g., which team, research group) and on behalf of which entity (e.g.,**  
803 **company, institution, organization)?**

804 • INQUIRE and iNat24 were created by a group of researchers from the following affiliations:  
805 iNaturalist, the Massachusetts Institute of Technology, University College London, Univer-  
806 sity of Edinburgh, and University of Massachusetts Amherst. The dataset was created from  
807 data made publicly available by the citizen science platform iNaturalist [\[2\]](#).

808 **What support was needed to make this dataset?** (e.g. who funded the creation of the dataset? If  
809 there is an associated grant, provide the name of the grantor and the grant name and number, or if it  
810 was supported by a company or government agency, give those details.)

811 • Funding for annotation was provided by the Generative AI Laboratory (GAIL) at the  
812 University of Edinburgh. In addition, team members were supported in part by the Global  
813 Center on AI and Biodiversity Change (NSF OISE-2330423 and NSERC 585136) and the  
814 Biome Health Project funded by WWF-UK.

815 **Any other comments?**

816 • N/A

817 **K.2 Composition**

818 **What do the instances that comprise the dataset represent (e.g., documents, photos, people,**  
819 **countries)?** Are there multiple types of instances (e.g., movies, users, and ratings; people and  
820 interactions between them; nodes and edges)? Please provide a description.

821 • The dataset consists of images depicting natural world phenomena (i.e., plant and animals  
822 species). In addition, it also contains natural language text queries representing scientific  
823 questions of interest. Each query is associated with a set of relevant images which came up  
824 after comprehensive labeling among the natural world image collection.

825 **How many instances are there in total (of each type, if appropriate)?**

826 • INQUIRE contains 200 text queries and a total of 24,336 relevant image matches.  
827 • iNat24 contains 4,813,543 images from 9,959 species categories.

828 **Does the dataset contain all possible instances or is it a sample (not necessarily random) of**  
829 **instances from a larger set?** If the dataset is a sample, then what is the larger set? Is the  
830 sample representative of the larger set (e.g., geographic coverage)? If so, please describe how  
831 this representativeness was validated/verified. If it is not representative of the larger set, please  
832 describe why not (e.g., to cover a more diverse range of instances, because instances were withheld  
833 or unavailable).

834 • The dataset contains approximately five million images sourced from iNaturalist. This is  
835 a subset of the total number of images present on iNaturalist. The selection and filtering  
836 process used to construct the dataset is described in Section [H](#).

837 **What data does each instance consist of?** “Raw” data (e.g., unprocessed text or images) or  
838 features? In either case, please provide a description.

- 839 • Each INQUIRE instance consists of a text query and a set of images representing all relevant  
840 matches for the query within iNat24.
- 841 • Each iNat24 instance is an image that is associated with a set of metadata, including the  
842 species label, location (latitude and longitude), observation time, license, image dimensions,  
843 and full taxonomic classification.

844 **Is there a label or target associated with each instance?** If so, please provide a description.

- 845 • In INQUIRE each query is paired with a set of positive image matches from iNat24.
- 846 • iNat24 has species labels associated with each image. The species labels are obtained  
847 from ‘research grade’ labels that have been generated from the community consensus on  
848 iNaturalist.

849 **Is any information missing from individual instances?** If so, please provide a description,  
850 explaining why this information is missing (e.g., because it was unavailable). This does not include  
851 intentionally removed information, but might include, e.g., redacted text.

- 852 • There is no information relevant to the task of the dataset omitted.

853 **Are relationships between individual instances made explicit (e.g., users’ movie ratings, social  
854 network links)?** If so, please describe how these relationships are made explicit.

- 855 • The image id, species taxonomy, locations, and time captured are provided with each image.

856 **Are there recommended data splits (e.g., training, development/validation, testing)?** If so,  
857 please provide a description of these splits, explaining the rationale behind them.

- 858 • For INQUIRE, the queries and their relevant images are utilized solely for evaluation purposes  
859 within this paper and thus, there are no splits provided.
- 860 • The iNat24 dataset provides additional training data which can be used in conjunction with  
861 the validation and test splits from iNat21 [\[70\]](#). More discussion of splits can be found in  
862 Section [H.1](#).

863 **Are there any errors, sources of noise, or redundancies in the dataset?** If so, please provide a  
864 description.

- 865 • While the species labels for each image in iNat24 are generated via consensus from multiple  
866 citizen scientists, there may still be errors in the labels which our evaluation will inherit.  
867 However, this error rate is estimated to be low [\[47\]](#).
- 868 • INQUIRE annotations may also contains noise in relevance scoring due to labeling error.  
869 However, we extensively labeled relevant queries to ensure this error rate is low.

870 **Is the dataset self-contained, or does it link to or otherwise rely on external resources (e.g.,  
871 websites, tweets, other datasets)?** If it links to or relies on external resources, a) are there guarantees  
872 that they will exist, and remain constant, over time; b) are there official archival versions of the  
873 complete dataset (i.e., including the external resources as they existed at the time the dataset was  
874 created); c) are there any restrictions (e.g., licenses, fees) associated with any of the external resources  
875 that might apply to a future user? Please provide descriptions of all external resources and any  
876 restrictions associated with them, as well as links or other access points, as appropriate.

877 • INQUIRE and iNat24 are self-contained datasets, as they include images and metadata that  
878 are directly available to download in their raw format without linking to any other external  
879 resources.

880 **Does the dataset contain data that might be considered confidential (e.g., data that is pro-**  
881 **TECTED BY LEGAL PRIVILEGE OR BY DOCTOR-PATIENT CONFIDENTIALITY, DATA THAT INCLUDES THE CONTENT OF**  
882 **INDIVIDUALS' NON-PUBLIC COMMUNICATIONS)?** If so, please provide a description.

883 • No, our dataset does not contain confidential data. The images that are part of it have been  
884 made publicly available by the users of iNaturalist.

885 **Does the dataset contain data that, if viewed directly, might be offensive, insulting, threatening,**  
886 **OR MIGHT OTHERWISE CAUSE ANXIETY?** If so, please describe why.

887 • iNat24 contains pictures of the natural world (e.g., plant and animal species) captured by  
888 community volunteers. Some natural world images in this dataset could be disturbing to  
889 some viewers, e.g., there are a small number of images that contain dead animals. We  
890 include these images in the dataset as they are ecologically and scientifically useful, e.g., for  
891 studying the impact of roadkill on animal populations.

892 **Does the dataset relate to people?** If not, you may skip the remaining questions in this section.

893 • No, our dataset does not relate directly to people. Images of humans where their faces  
894 are visible have been filtered out using a combined manual and automated process. See  
895 Section [H.1](#) for a discussion of data filtering.

896 **Does the dataset identify any subpopulations (e.g., by age, gender)?** If so, please describe how  
897 these subpopulations are identified and provide a description of their respective distributions within  
898 the dataset.

899 • No, our dataset does not identify any human subpopulations.

900 **Is it possible to identify individuals (i.e., one or more natural persons), either directly or**  
901 **INDIRECTLY (i.e., in combination with other data) FROM THE DATASET?** If so, please describe how.

902 • Some images publicly uploaded by users to the iNaturalist platform contain identifiable  
903 information, including pictures containing human faces, IDs, or license plates. To address  
904 this, we filter iNat24 to remove all such instances that we can identify, including by running  
905 detection algorithms to find all instances of human faces. More details are provided in  
906 Section [H.1](#).

907 • All photos used to construct iNat24 come from observations captured by community vol-  
908 unteers who have given their images a suitable license for research use. We respect these  
909 licenses by providing the license information for each image as well as the rights holder in  
910 the metadata. The user-provided rights holder name can contain the user's iNaturalist user  
911 ID. This information is already available publicly from the iNaturalist platform.

912 **Does the dataset contain data that might be considered sensitive in any way (e.g., data that**  
913 **REVEALS RACIAL OR ETHNIC ORIGINS, SEXUAL ORIENTATIONS, RELIGIOUS BELIEFS, POLITICAL OPINIONS OR**  
914 **UNION MEMBERSHIPS, OR LOCATIONS; FINANCIAL OR HEALTH DATA; BIOMETRIC OR GENETIC DATA; FORMS**  
915 **OF GOVERNMENT IDENTIFICATION, SUCH AS SOCIAL SECURITY NUMBERS; CRIMINAL HISTORY)?** If so, please  
916 provide a description.

917 • No, our dataset does not aim to contain any data that can be considered sensitive in the ways  
918 discussed above. Details on how we filter iNat24 to remove all sensitive data are provided  
919 in Section [H.1](#).

920 **Any other comments?**

921 • N/A

### 922 K.3 Collection

923 **How was the data associated with each instance acquired?** Was the data directly observable (e.g.,  
924 raw text, movie ratings), reported by subjects (e.g., survey responses), or indirectly inferred/derived  
925 from other data (e.g., part-of-speech tags, model-based guesses for age or language)? If data was  
926 reported by subjects or indirectly inferred/derived from other data, was the data validated/verified? If  
927 so, please describe how.

928 

- The queries contained within INQUIRE come from discussions and interviews with a range  
929 of experts including ecologists, biologists, ornithologists, entomologists, oceanographers,  
930 and forestry experts. This resulted in 200 text queries. Annotators were instructed to label  
931 candidate images from iNat24 as either *relevant* (i.e., positive match) or *not relevant* (i.e.,  
932 negative match) to a query, and to mark an image as not relevant if there was reasonable  
933 doubt. To allow for comprehensive labeling, where applicable, iNat24 species labels were  
934 used to narrow down the search to a sufficiently small size to label all relevant images for  
935 the query of interest. The annotation process is outlined in Section [H.2](#).

936 **Over what timeframe was the data collected?** Does this timeframe match the creation timeframe  
937 of the data associated with the instances (e.g., recent crawl of old news articles)? If not, please  
938 describe the timeframe in which the data associated with the instances was created. Finally, list when  
939 the dataset was first published.

940 

- The collection of iNat24 started with a iNaturalist observation database export generated  
941 on 2023-12-30. From this export, we filter observations to only include those added to  
942 iNaturalist in the years 2021, 2022, or 2023.
- The collection of INQUIRE queries and comprehensive labeling of their relevant images  
943 within iNat24 took place between January 2024 (following data export from iNaturalist) and  
944 end of May 2024.
- The dataset is not yet public, but will be made available prior to the NeurIPS 2024 conference  
945 conditioned on acceptance.

946 **What mechanisms or procedures were used to collect the data (e.g., hardware apparatus or**  
947 **sensor, manual human curation, software program, software API)?** How were these mechanisms  
948 or procedures validated?

949 

- The iNat24 dataset was sourced from a GBIF export of the iNaturalist database.
- To comprehensively label the images that match each query in INQUIRE, we utilized a  
950 custom interface. For more information see Section [H.2](#).

951 **What was the resource cost of collecting the data?**

952 

- N/A

953 **If the dataset is a sample from a larger set, what was the sampling strategy (e.g., deterministic,**  
954 **probabilistic with specific sampling probabilities)?**

955 

- iNat24 was sampled from an export of the iNaturalist platform and consists of image  
956 observations made in the years 2021, 2022, or 2023. Details about the sampling strategy can  
957 be found in Section [H.1](#).

958 **Who was involved in the data collection process (e.g., students, crowdworkers, contractors) and**  
959 **how were they compensated (e.g., how much were crowdworkers paid)?**

960 

- The queries contained within INQUIRE came from discussions and interviews with a range  
961 of experts including ecologists, biologists, ornithologists, entomologists, oceanographers,  
962 and forestry experts. Image annotation was performed by a carefully selected team of paid  
963

966 MSc students or equivalent, many with expertise in ecology allowing for labeling of difficult  
967 queries. These annotators were paid at the equivalent of \$15.50 per hour.

968 **Were any ethical review processes conducted (e.g., by an institutional review board)?** If so,  
969 please provide a description of these review processes, including the outcomes, as well as a link or  
970 other access point to any supporting documentation.

971 • We received internal ethical approval for our query collection and data labeling (Edinburgh  
972 Informatics Ethics Review Panel 951781 and MIT Committee on the Use of Humans as  
973 Experimental Subjects Protocol 2404001276).

974 **Does the dataset relate to people?** If not, you may skip the remainder of the questions in this  
975 section.

976 • N/A. The dataset contains images of different plant and animal species that have been  
977 made publicly available by users of the citizen science platform iNaturalist under a creative  
978 commons or similar license.

979 **Did you collect the data from the individuals in question directly, or obtain it via third parties  
980 or other sources (e.g., websites)?**

981 • N/A

982 **Were the individuals in question notified about the data collection?** If so, please describe (or  
983 show with screenshots or other information) how notice was provided, and provide a link or other  
984 access point to, or otherwise reproduce, the exact language of the notification itself.

985 • N/A

986 **Did the individuals in question consent to the collection and use of their data?** If so, please  
987 describe (or show with screenshots or other information) how consent was requested and provided,  
988 and provide a link or other access point to, or otherwise reproduce, the exact language to which the  
989 individuals consented.

990 • N/A

991 **If consent was obtained, were the consenting individuals provided with a mechanism to revoke  
992 their consent in the future or for certain uses?** If so, please provide a description, as well as a link  
993 or other access point to the mechanism (if appropriate)

994 • N/A

995 **Has an analysis of the potential impact of the dataset and its use on data subjects (e.g., a data  
996 protection impact analysis) been conducted?** If so, please provide a description of this analysis,  
997 including the outcomes, as well as a link or other access point to any supporting documentation.

998 • N/A

999 **Any other comments?**

1000 • N/A

#### 1001 **K.4 PREPROCESSING / CLEANING / LABELING**

1002 **Was any preprocessing/cleaning/labeling of the data done (e.g., discretization or bucketing,  
1003 tokenization, part-of-speech tagging, SIFT feature extraction, removal of instances, processing  
1004 of missing values)?** If so, please provide a description. If not, you may skip the remainder of the  
1005 questions in this section.



1006 • Besides resizing, we do not modify the images. Data cleaning is done to remove personally  
1007 identifiable information or otherwise unsuitable images.

1008 **Was the “raw” data saved in addition to the preprocessed/cleaned/labeled data (e.g., to support  
1009 unanticipated future uses)?** If so, please provide a link or other access point to the “raw” data.

1010 • N/A

1011 **Is the software used to preprocess/clean/label the instances available?** If so, please provide a  
1012 link or other access point.

1013 • We use the following to aid in preprocessing:  
1014 - img2dataset: <https://github.com/rom1504/img2dataset>  
1015 - OpenCLIP: [https://github.com/mlfoundations/open\\_clip](https://github.com/mlfoundations/open_clip)  
1016 - Face detector: [https://github.com/biubug6/Pytorch\\_Retinaface](https://github.com/biubug6/Pytorch_Retinaface)

1017 **Any other comments?**

1018 • N/A

## 1019 **K.5 USES**

1020 **Has the dataset been used for any tasks already?** If so, please provide a description.

1021 • In our paper we use the INQUIRE dataset to benchmark several multimodal models on  
1022 text-to-image retrieval. It has not been used for any tasks prior to this.

1023 **Is there a repository that links to any or all papers or systems that use the dataset?** If so, please  
1024 provide a link or other access point.

1025 • Currently there is no such repository as the dataset is not public. We will collate one after  
1026 the dataset has been released.

1027 **What (other) tasks could the dataset be used for?**

1028 • The iNat24 dataset could be used for training supervised fine-grained image classifiers. It  
1029 could also be used for training self-supervised methods. The text pairs in INQUIRE could  
1030 potentially be used to fine-tune fine-grained image generation models and vision language  
1031 models.

1032 **Is there anything about the composition of the dataset or the way it was collected and prepro-  
1033 cessed/cleaned/labeled that might impact future uses?** For example, is there anything that a future  
1034 user might need to know to avoid uses that could result in unfair treatment of individuals or groups  
1035 (e.g., stereotyping, quality of service issues) or other undesirable harms (e.g., financial harms, legal  
1036 risks) If so, please provide a description. Is there anything a future user could do to mitigate these  
1037 undesirable harms?

1038 • The images from the iNat24 dataset are not uniformly distributed across the globe (see  
1039 Figure A3). Their spatial distribution reflects the spatial biases present in the iNaturalist  
1040 platform. As a result, image classifiers trained on these models may preform worse on  
1041 images from currently underrepresented regions.

1042 • To decrease this bias we sample from spatio-temporal clusters of “observations groups”.  
1043 Observation groups are formed by grouping observations together if they are observed on the  
1044 same day within 10km of each other, regardless of the observer. When sampling observations  
1045 for a species, we cluster their associated observation groups using a spatio-temporal distance  
1046 metric and then sample one observation per cluster in a round-robin fashion until we hit a  
1047 desired sample size. When sampling within a cluster, we prioritize novel observation groups  
1048 and novel users.

1049 • In future, this issue could be further mitigated as more data from currently underrepresented  
1050 regions becomes available.

1051 **Are there tasks for which the dataset should not be used?** If so, please provide a description.

- 1052 • There could be unintended negative consequences if conservation assessments were made  
1053 based on the predictions from biased or inaccurate models developed to perform well on  
1054 INQUIRE. Where relevant, we have attempted to flag these performance deficiencies in the  
1055 main paper.
- 1056 • While we have filtered out personally identifiable information from our images, the retrieval  
1057 paradigm allows for free-form text search. In real-world text-to-image retrieval applications  
1058 care should be taken to ensure that appropriate text filters are in-place to prevent inaccurate  
1059 or hurtful associations being made between user queries and images of wildlife.

1060 **Any other comments?**

- 1061 • N/A

## 1062 **K.6 DISTRIBUTION**

1063 **Will the dataset be distributed to third parties outside of the entity (e.g., company, institution,  
1064 organization) on behalf of which the dataset was created?** If so, please provide a description.

- 1065 • Yes, INQUIRE and iNat24 will be publicly available for download.

1066 **How will the dataset will be distributed (e.g., tarball on website, API, GitHub)?** Does the dataset  
1067 have a digital object identifier (DOI)?

- 1068 • The dataset is distributed as a tarball. Links to the dataset download are available on our  
1069 GitHub repository at <https://github.com/inquire-benchmark/INQUIRE>

1070 **When will the dataset be distributed?**

- 1071 • The dataset will be publicly released conditioned on acceptance.

1072 **Will the dataset be distributed under a copyright or other intellectual property (IP) license,  
1073 and/or under applicable terms of use (ToU)?** If so, please describe this license and/or ToU, and  
1074 provide a link or other access point to, or otherwise reproduce, any relevant licensing terms or ToU,  
1075 as well as any fees associated with these restrictions.

- 1076 • The dataset will have the following ToU: By downloading this dataset you agree to the  
1077 following terms
  - 1078 – You will abide by the iNaturalist Terms of Service [https://www.inaturalist.org/  
1079 pages/terms](https://www.inaturalist.org/pages/terms).
  - 1080 – You will use the data only for non-commercial research and educational purposes.
  - 1081 – You will NOT distribute the dataset images.
  - 1082 – The University of Massachusetts Amherst makes no representations or warranties  
1083 regarding the data, including but not limited to warranties of non-infringement or  
1084 fitness for a particular purpose.
  - 1085 – You accept full responsibility for your use of the data and shall defend and indemnify  
1086 the University of Massachusetts Amherst, including its employees, officers and agents,  
1087 against any and all claims arising from your use of the data, including but not limited  
1088 to your use of any copies of copyrighted images that you may create from the data.

1089 **Have any third parties imposed IP-based or other restrictions on the data associated with  
1090 the instances?** If so, please describe these restrictions, and provide a link or other access point

1091 to, or otherwise reproduce, any relevant licensing terms, as well as any fees associated with these  
1092 restrictions.

1093 • Each image is accompanied with a specific license selected by the contributor. See the  
1094 dataset for details.

1095 **Do any export controls or other regulatory restrictions apply to the dataset or to individual**  
1096 **instances?** If so, please describe these restrictions, and provide a link or other access point to, or  
1097 otherwise reproduce, any supporting documentation.

1098 • N/A

1099 **Any other comments?**

1100 • N/A

## 1101 **K.7 MAINTENANCE**

1102 **Who is supporting/hosting/maintaining the dataset?**

1103 • The dataset is hosted on AWS supported by the AWS Open Data Program.

1104 **How can the owner/curator/manager of the dataset be contacted (e.g., email address)?**

1105 • Questions, clarifications, and issues can be raised via the GitHub page: <https://github.com/inquire-benchmark/INQUIRE>  
1106

1107 **Is there an erratum?** If so, please provide a link or other access point.

1108 • Issues can be raised via the GitHub page: <https://github.com/inquire-benchmark/INQUIRE>  
1109

1110 **Will the dataset be updated (e.g., to correct labeling errors, add new instances, delete instances)?**  
1111 If so, please describe how often, by whom, and how updates will be communicated to users (e.g.,  
1112 mailing list, GitHub)?

1113 • There may be a future version of the dataset, however we do not intend for the dataset to be  
1114 frequently changing.

1115 **If the dataset relates to people, are there applicable limits on the retention of the data associated**  
1116 **with the instances (e.g., were individuals in question told that their data would be retained for a**  
1117 **fixed period of time and then deleted)?** If so, please describe these limits and explain how they  
1118 will be enforced.

1119 • N/A

1120 **Will older versions of the dataset continue to be supported/hosted/maintained?** If so, please  
1121 describe how. If not, please describe how its obsolescence will be communicated to users.

1122 • Previous versions of the iNaturalist image datasets can be found here [https://github.com/visipedia/inat\\_comp/tree/master](https://github.com/visipedia/inat_comp/tree/master)  
1123

1124 **If others want to extend/augment/build on/contribute to the dataset, is there a mechanism for**  
1125 **them to do so?** If so, please provide a description. Will these contributions be validated/verified? If  
1126 so, please describe how. If not, why not? Is there a process for communicating/distributing these  
1127 contributions to other users? If so, please provide a description.

1128 • Contributors can join the iNaturalist platform: <https://www.inaturalist.org/>

1129 **Any other comments?**

1130 • N/A
